# Supplementary material for: Network‐Independent Grid Synchronous Stability Boundary and Spontaneous Synchronization
Source: Preprints.org preprint supplement (doi:10.20944/preprints202310.1791.v4), 2024-03-14
Supplement: Supplementary file 1 [file supplementary]

**Figure S1. Stability boundary for generators**


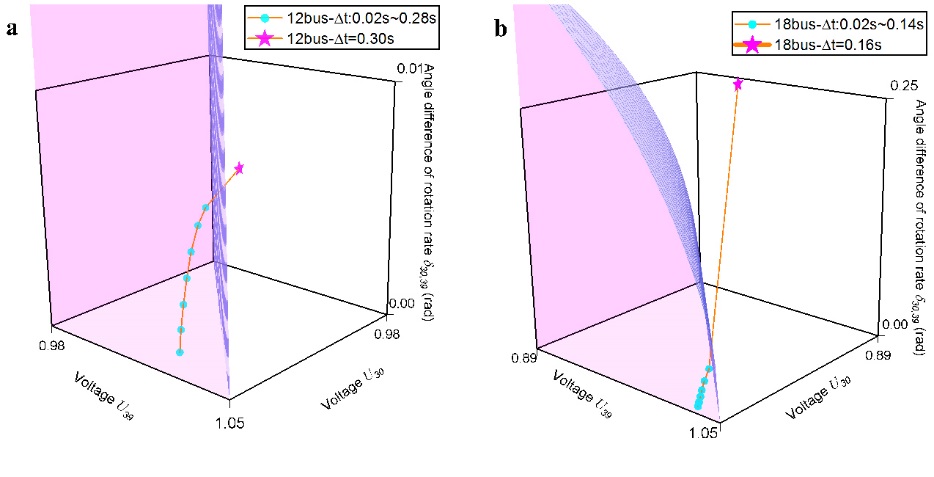


a and b correspond to New England test system, generator disturbed instability process Schematic diagram of the disturbed trajectory of the operating point crossing the boundary after a three-phase short-circuit ground fault at 12-node and 18-node in node IEEE39 with gradually increasing ∆t, respectively. (∆t increases from 0.04s, until destabilization)

**Figure S2. Fitting results for generator perturbed trajectories of 12node after a three-phase short circuit to ground fault**


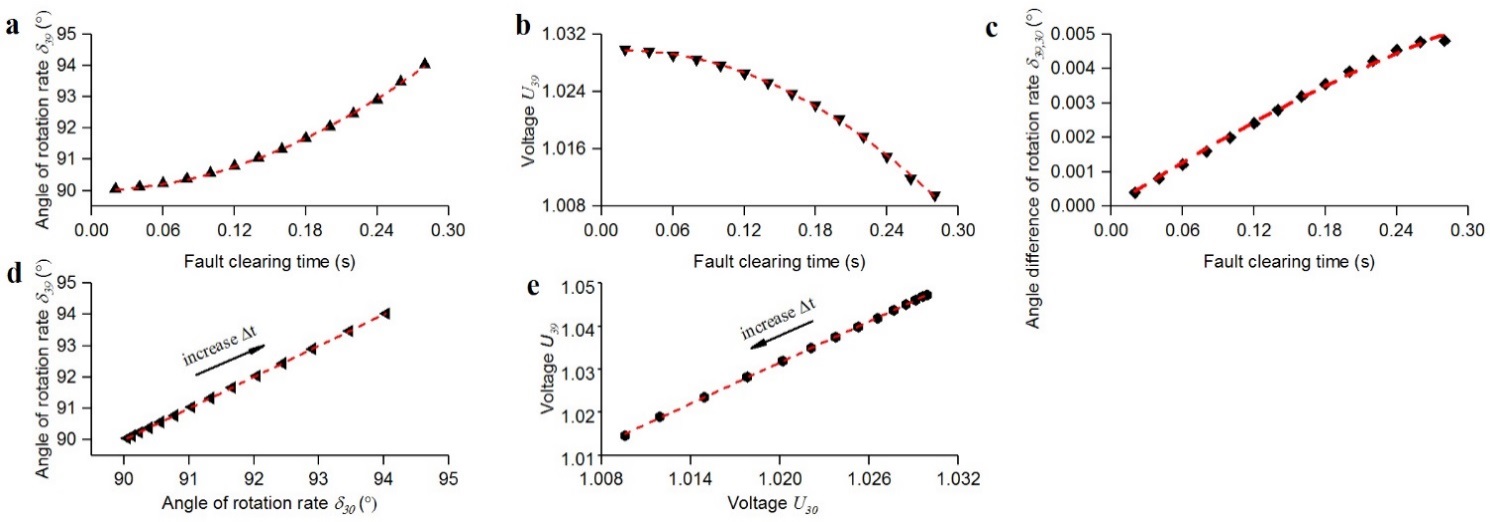


The expressions for the disturbed operating points of the meta-generators and generators have the same form before and after permutation.

a. The projection of the disturbed trajectory in the
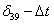
 plane. The result of the fit is
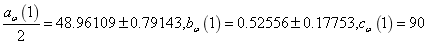
, and the adjusted R-squared value is 1.

b. The projection of the disturbed trajectory in the
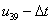
 plane. The result of the fit is
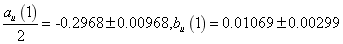
 and the adjusted R-squared value is 0.99905.

c. The projection of the disturbed trajectory in the
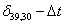
 plane. The result of the fit is
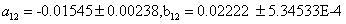
 and the adjusted R-squared value is 0.9993.

d. The projection of the disturbed trajectory in the
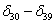
 plane. The result of the fit is
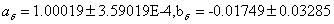
 and the adjusted R-squared value is 1.

e. The projection of the disturbed trajectory in the
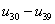
 plane. The result of the fit is
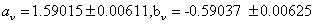
 and the adjusted R-squared value is 0.99981.

**Figure S3. New England test system, self-organizing behavior of generators near the boundary**

**
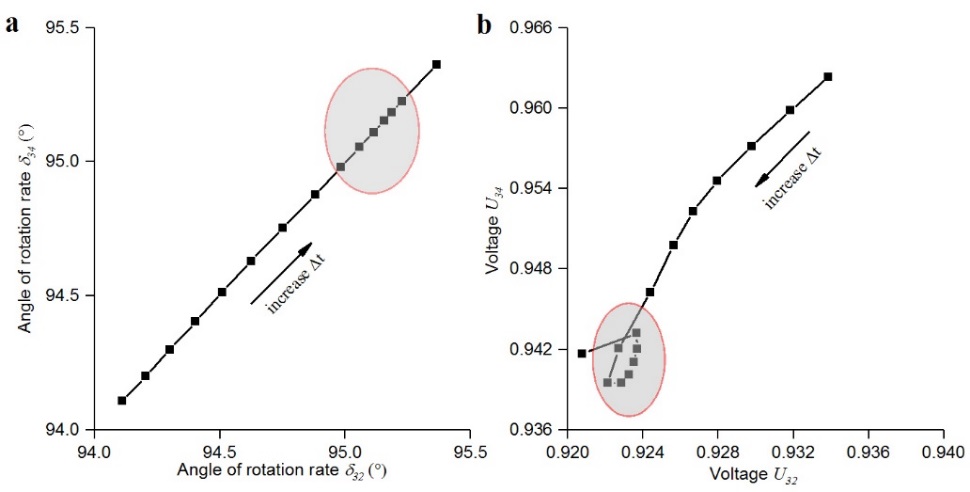
**

The 18-node three-phase short-circuit ground fault, increase in fault time from 0.140s to 0.154s, and the trajectory of disturbed operating point near the boundary. The arrow shows the direction of increase of . The generator has the same barrier and attractor as the meta-generator.

a. In the plane, running points appear to cross the barrier before they reach the boundary, and the elliptical area marks the position of the barrier. From 0.147s onwards the interval between running points decreases in the direction of increasing

b. In the plane, the graph is presented as a critical state local attractor, which appears simultaneously with the synchronous barrier. The ellipse indicates the position of the attractor. The graph of the trajectory of the run point from 0.147s onwards is shown as an attractor (in the shaded area).

The perturbed trajectory of the generator shows the same result at the same time.

**Figure S4. Stability boundary for meta-generators for 3-generator test system**

a. The same boundary equation applise to the 3-gen system. 4-node sets the location of the operating point after a three-phase short-circuit ground fault.

b. Results of the multiswing instability for Δt=0.245s.

c and d are the results of the 4-node three-phase ground fault simulation, respectively. It is synchronization at , out-of-Sync at , and out-of-Sync in .

**Figure S5. Fitting results for meta-generator perturbed trajectories of 4-node after a three-phase short circuit to ground fault**

**
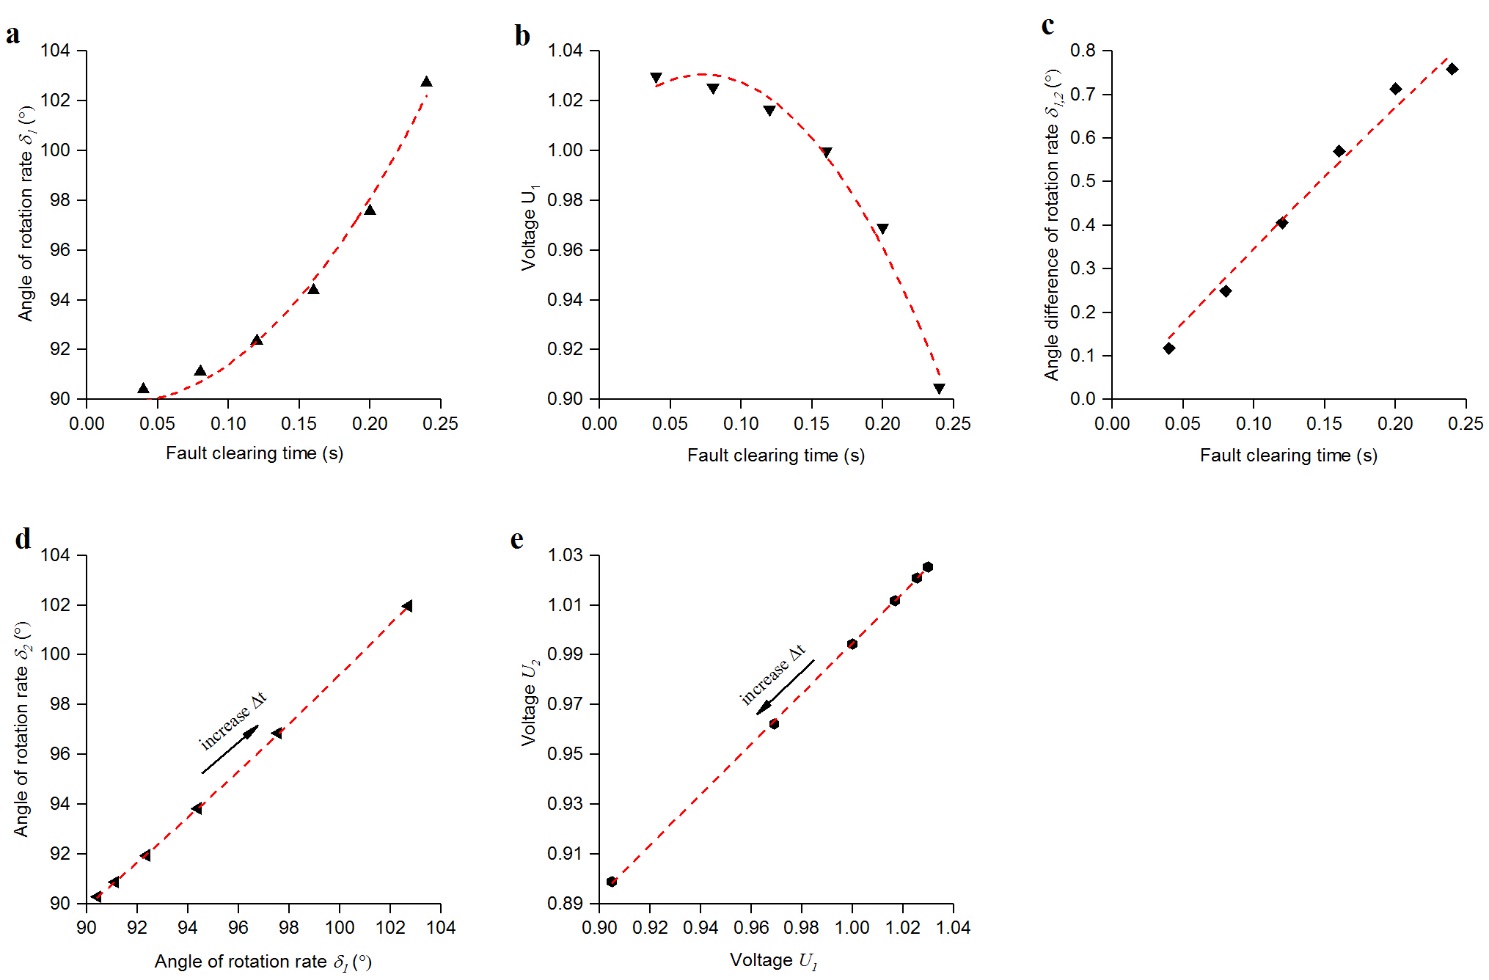
**

Fitting results for perturbed trajectories for the 4-node trajectory of disturbed operating points after a three-phase short-circuit ground fault..

a. The projection of the disturbed trajectory in the plane. The result of the fit is . The adjusted R-squared value is 0.99997.

b. The projection of the disturbed trajectory in the plane. The result of the fit is , and the adjusted R-squared value is 0.97679.

c. The projection of the disturbed trajectory in the plane. The result of the fit is , and the adjusted R-squared value is 0.99519.

d. The projection of the disturbed trajectory in the plane. The result of the fit is , and the adjusted R-squared value is 0.99925.

e. The projection of the disturbed trajectory in the plane. The result of the fit is , and the adjusted R-squared value is 0.99973.

**Figure S6. Spontaneous synchronization behaviour of running points near the boundary**

**
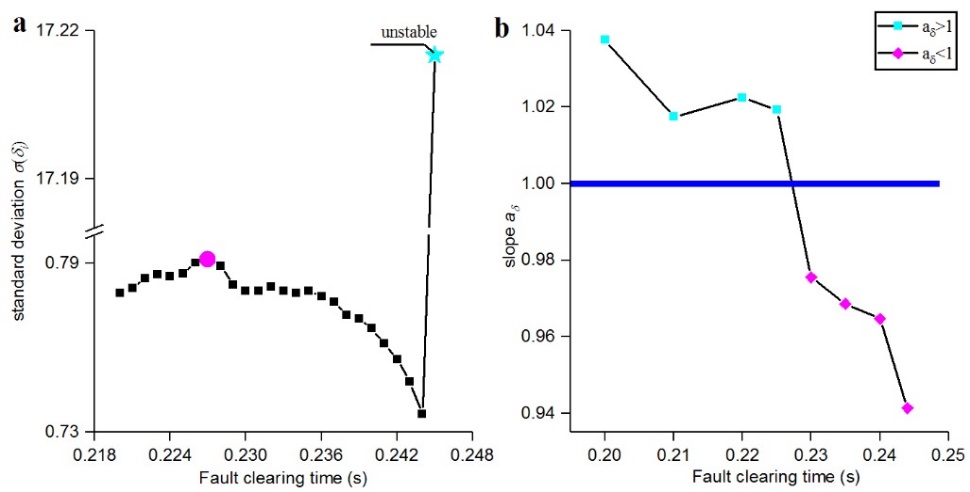
**

a. The standard deviation of δ decreases from ∆t=0.227s. It rises by 2200% at ∆t=0.245s, where there is an instability.

b. Derive from the fitted equation (e). Due to the monotonicity of with respect to , i.e. , changes from positive to negative and changes from greater than 1 to less than 1.

**Figure S7. New England test system, Spontaneous synchronisation always occurs near the synchronisation stability boundary**

**
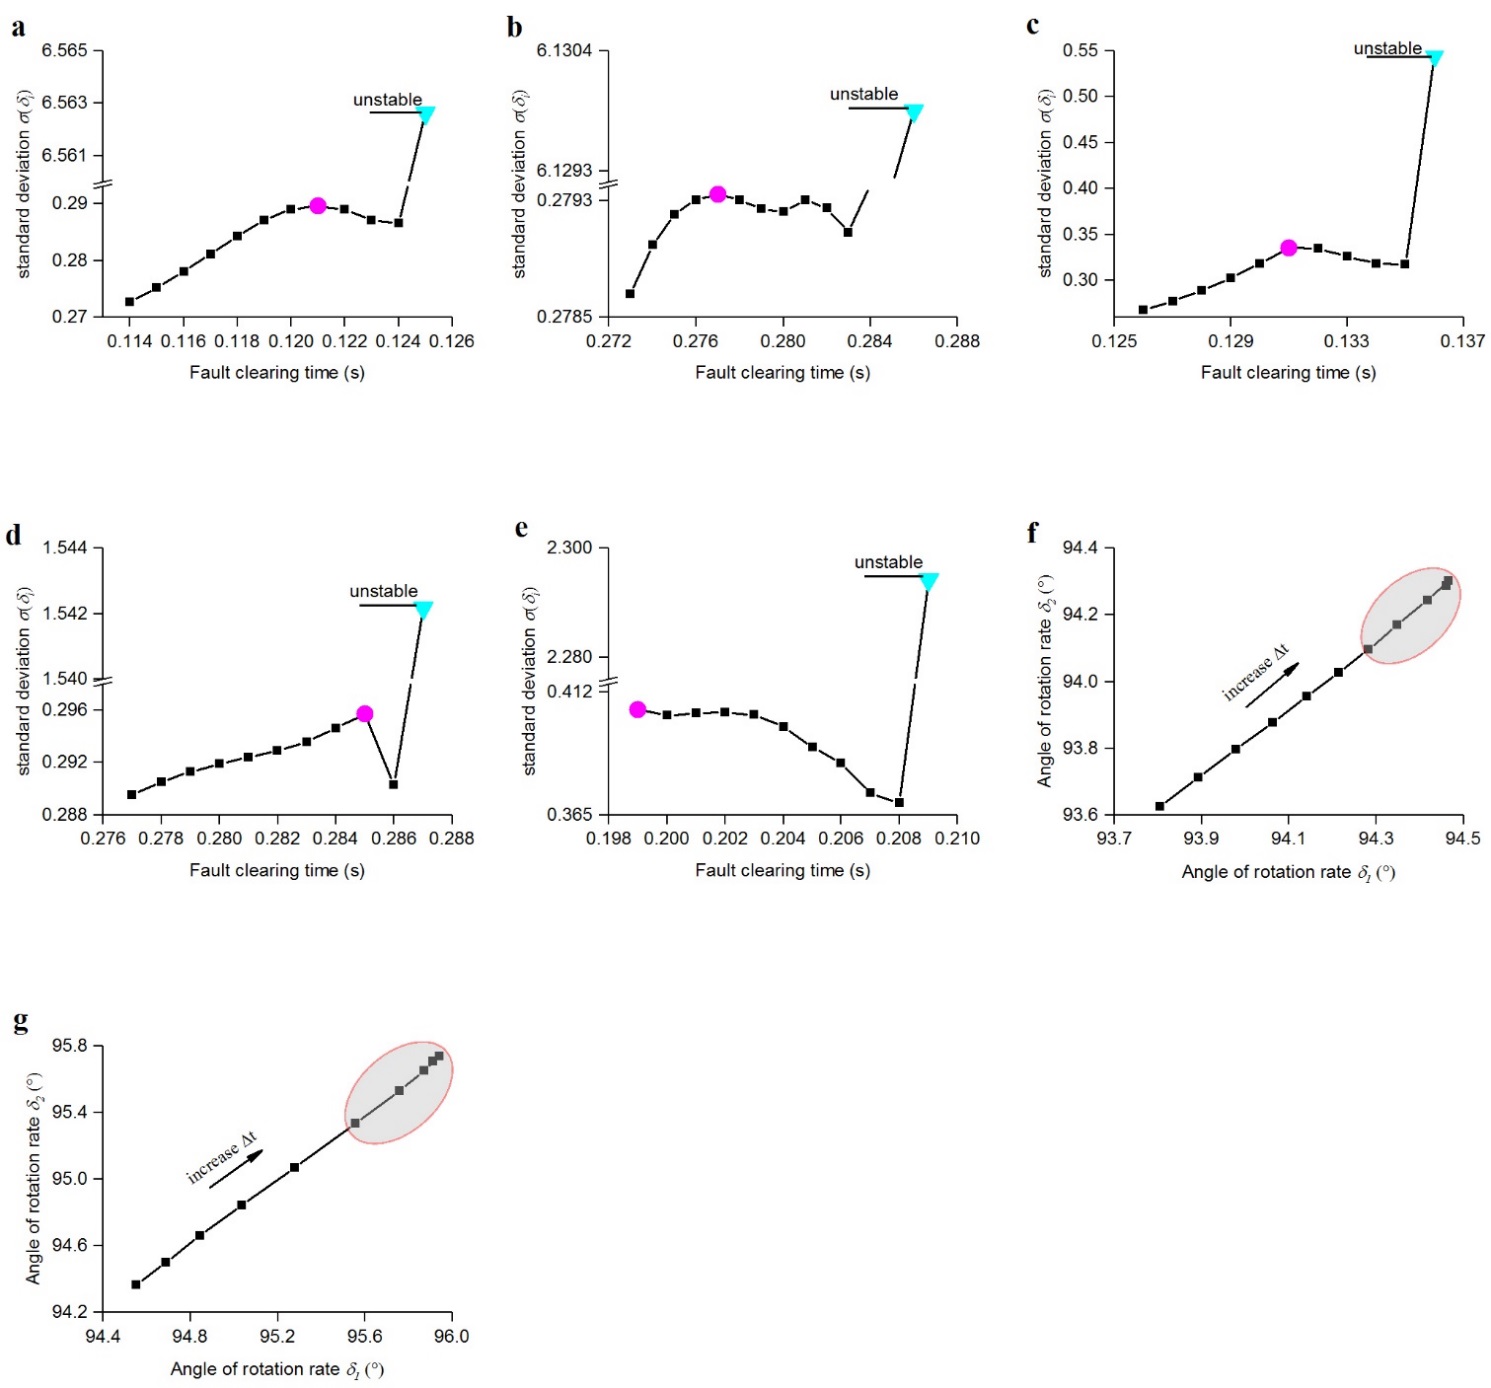
**

A three-phase short-circuit ground fault is set at the corresponding node. a, b, c, d, e correspond to the critical behaviour of the operating points after the failure of 6-node, 12-node, 24-node, 30-node & 36-node respectively. All the results show that near the boundary, there is always a significant decrease in . These results demonstrate a strong correlation between synchronisation stability boundary and spontaneous synchronisation.

f and g show that the behaviour of the operating points also show the phenomenon of synchronous barrier when faults are set at 6-node and 24-node (shaded area).

**Table S1. Comparison of the calculation results and simulation results of** 3-generator test system

|  |  |  |  |  | CCT(sim) |  |  |
| --- | --- | --- | --- | --- | --- | --- | --- |
| 1-node | 0.216458436 | 0.217493522 | 101.7701068 | 101.7899704 | 0.261 | 103.4561773 | 102.717359 |
| 2-node | 0.148766853 | 0.148921901 | 102.3039059 | 102.3001305 | 0.175 | 103.1645046 | 102.3751632 |
| 3-node | 0.188837149 | 0.191488989 | 112.2667075 | 113.1355617 | 0.197 | 103.7382964 | 102.6255101 |
| 4-node | 0.215642864 | 0.221222679 | 108.4552172 | 109.6851241 | 0.244 | 103.5455826 | 102.8048058 |
| 5-node | 0.255519801 | 0.259161898 | 100.4223862 | 100.7431053 | 0.309 | 104.3726544 | 103.7297785 |
| 6-node | 0.320606871 | 0.319818644 | 103.944007 | 104.0812709 | 0.335 | 103.1684111 | 102.3591619 |
| 7-node | 0.152581415 | 0.150874774 | 102.2891604 | 102.0961655 | 0.178 | 103.6087745 | 102.9104997 |
| 8-node | 0.243528417 | 0.237249582 | 105.8088309 | 105.3768654 | 0.246 | 103.788144 | 103.1207761 |
| 9-node | 0.14511492 | 0.145105771 | 99.21400341 | 99.04779081 | 0.191 | 102.5957322 | 101.5372799 |
